# Supplementary material for: VAP spatially stabilizes dendritic mitochondria to locally support synaptic plasticity
Source: PubMed Central journal article supplement (PMC10766606; doi:10.1038/s41467-023-44233-8), 2024-01-04
Supplement: 41467_2023_44233_MOESM1_ESM.pdf [file 41467_2023_44233_MOESM1_ESM.pdf]

VAP spatially stabilizes dendritic mitochondria to locally support synaptic plasticity  
Supplementary Information

Supplementary Figures

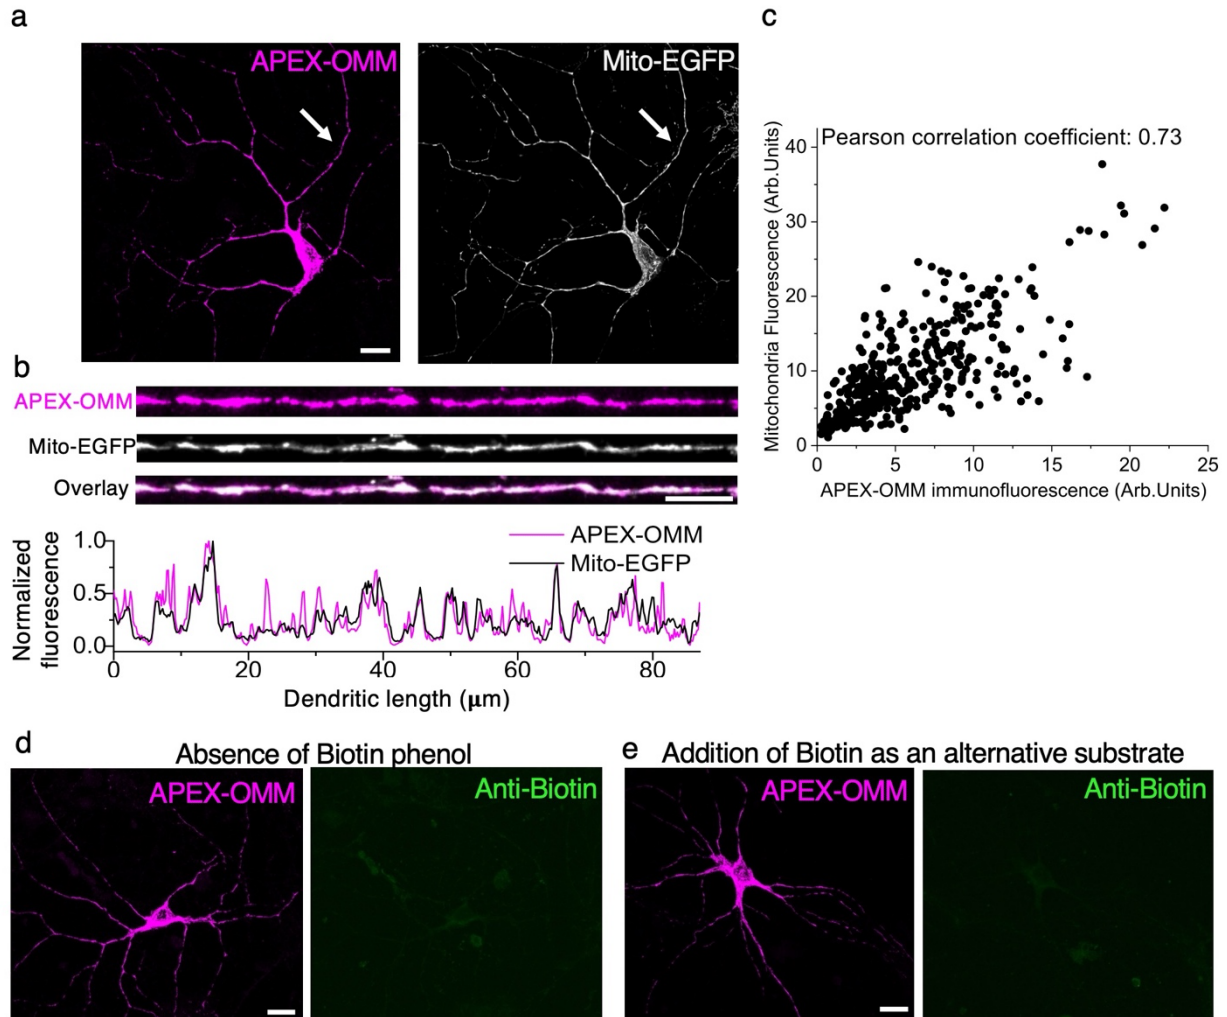

**Figure 1. Control experiments related to APEX-OMM expression and biotin labeling.** **a** APEX-OMM (magenta, same as in Figure 1b) and mitochondria fluorescence (white, Mito-EGFP) from the same neuron overlap. Scale bar, 20 μm. **b** Line profiles of the dendrites pointed in **a** (white arrows) show an overlap between APEX-OMM and mitochondria fluorescence. Scale bar 10 μm. **c** Representative correlation between individual fluorescent pixel intensities of APEX-OMM and mitochondria in **a** shows a strong correlation. total n: 9 neurons, 2 animals. Representative neuron images expressing APEX-OMM (magenta), showing the absence of biotin labeling (green) in the absence of biotin phenol (**d**) or the presence of biotin as an alternative

substrate (e). total n in neurons, animals: 19, 5 (d), 14, 3 (e). Scale bar, 10  $\mu$ m. Source Data files are provided.

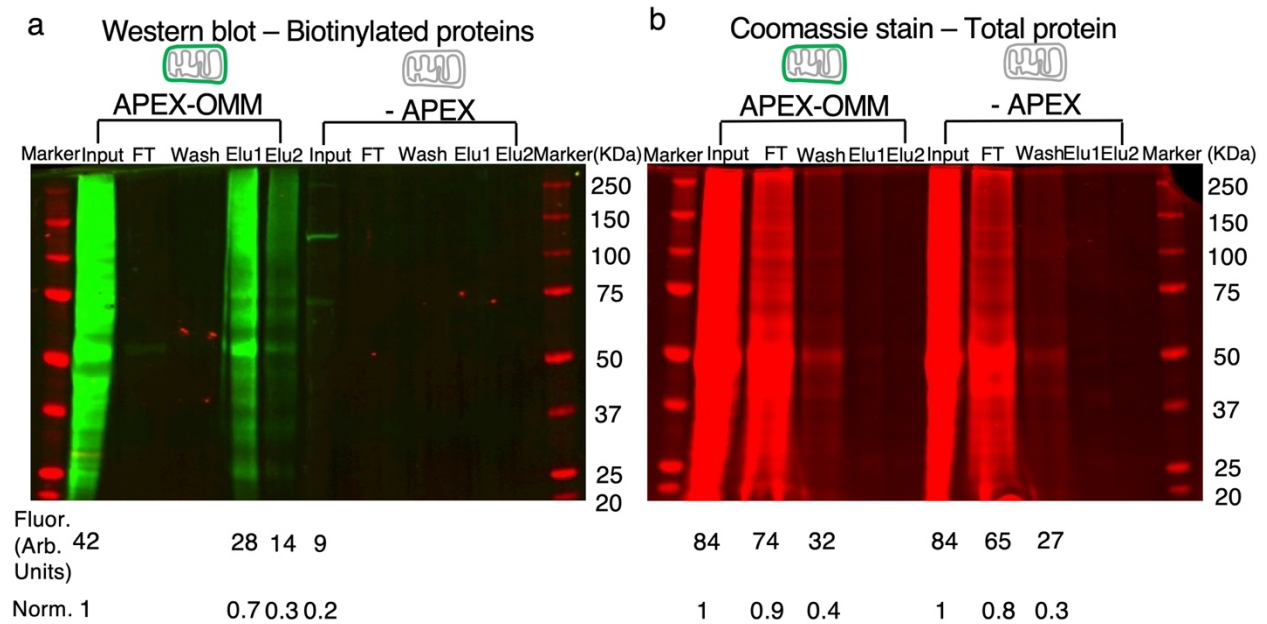

**Figure 2. Streptavidin enrichment of the biotin-labeled APEX-OMM proteome.** **a** Western blot analysis of the biotin-labeled, streptavidin-enriched proteome using anti-biotin immunodetection show significant biotin labeling in the input (Input) and eluate 1 (Elu1) of APEX-OMM samples, but not in -APEX (Control) samples. The residual biotin signal in -APEX (Control) represents endogenous biotinylated proteins present in mammalian cells<sup>1</sup>. **b** Coomassie staining analysis of the same experiment shows equal amounts of protein input used for APEX-OMM and -APEX (Control) samples, and most non-biotinylated proteins were washed out in the flow through (FT). Inset, Raw fluorescence intensities (Fluor.) and fluorescence normalized to APEX-OMM input (Norm.) for the respective lanes. Total n: 3 biological replicates, 3 animals.

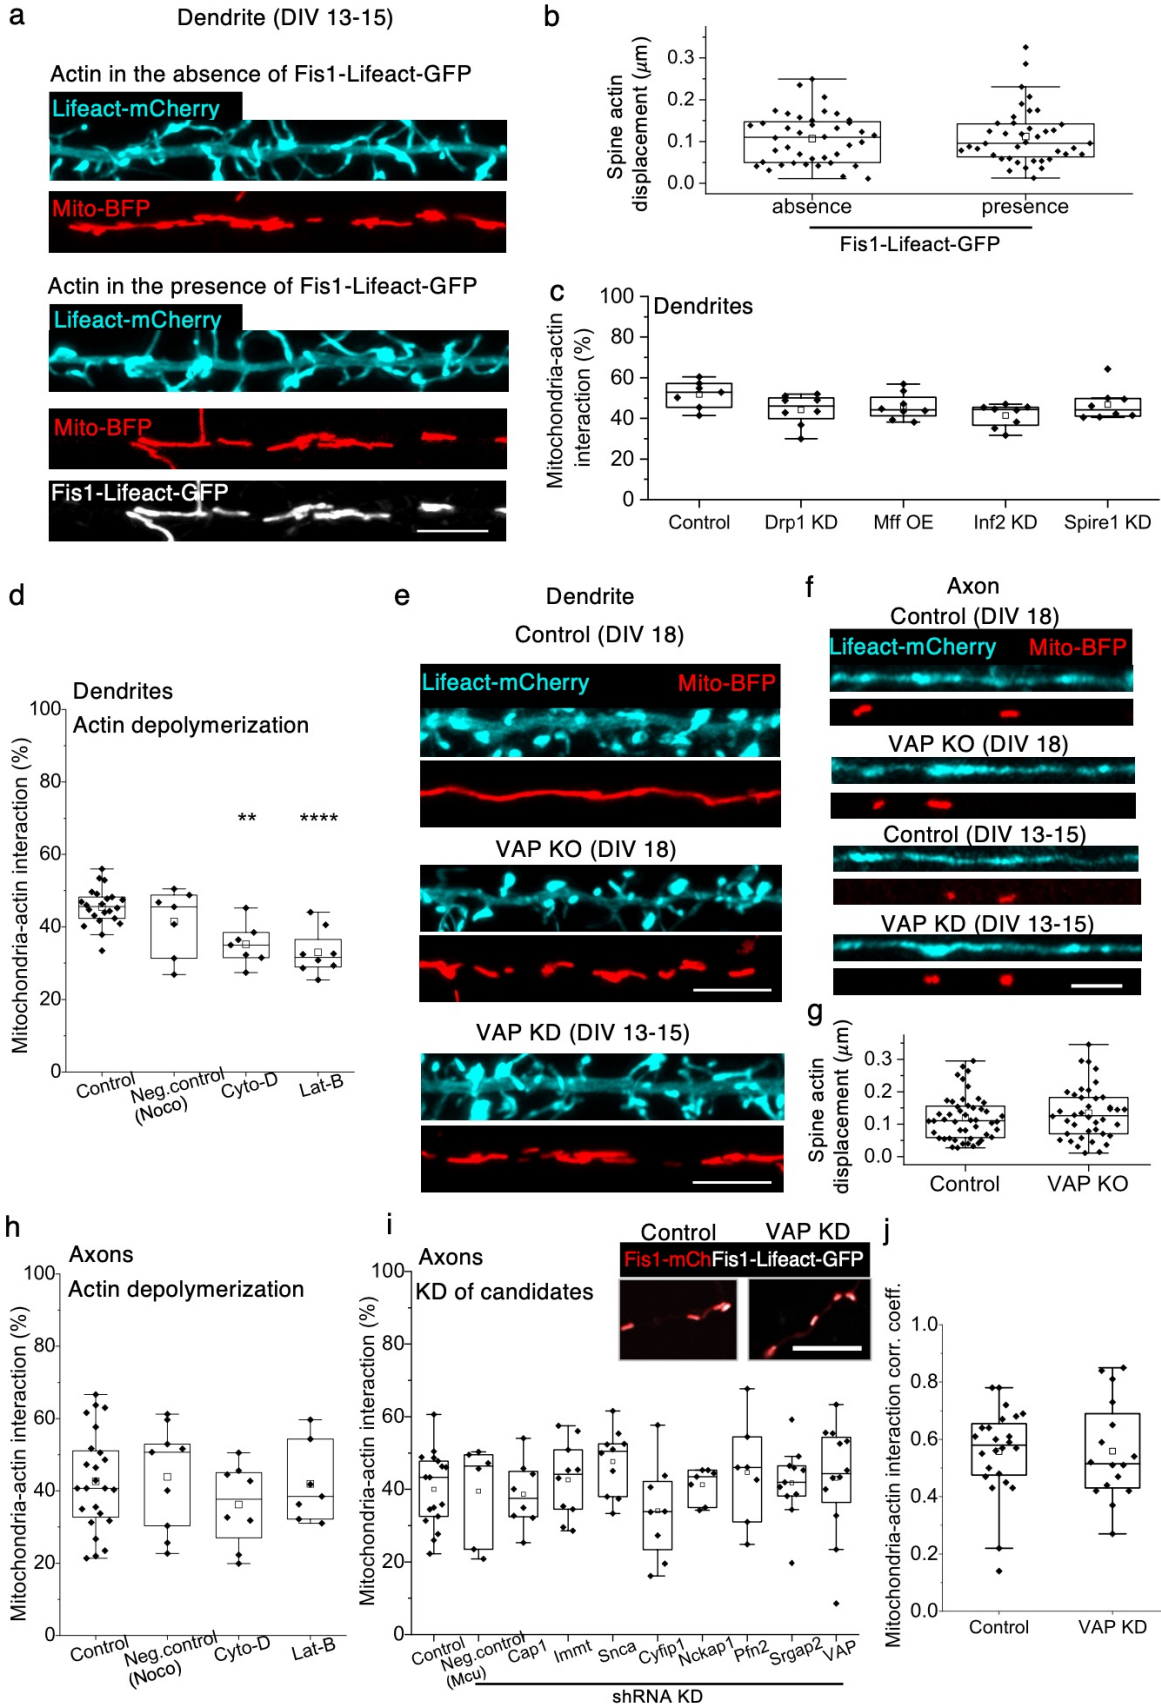

**Figure 3. Control experiments for Mitochondrial-actin interaction measurements. a** Representative Airyscan images (of **b**) of dendrites expressing Lifeact-mCherry (cyan), Mito-BFP (red), and Fis1-Lifeact-GFP (white). Scale bar, 5  $\mu\text{m}$ . **b** Average spine actin displacement on Fis1-Lifeact-GFP expression. n in spines, animals: 40, 1 (+/- Fis1-Lifeact-GFP). Two sample t-Test, p: 0.7. **c** Average mitochondria-actin interaction on lengthening (Drp KD), shortening mitochondria (Mff OE), or knocking down the mitochondrial fission factors Inf2 and Spire1. n in dendrites, animals: 7, 4 (Control), 8, 2 (Drp1 KD), 8, 3 (Mff OE), 8, 2 (Inf2 KD), 8, 2 (Spire1 KD). One-way ANOVA, Tukey test, p: 0.25 (Drp1 KD), 0.48 (Mff OE), 0.052 (Inf2 KD), 0.65 (Spire1 KD). **d** Average mitochondria-actin interaction on actin depolymerization using Cytochalasin-D (Cyto-D) and Latrunculin-B (Lat-B), and microtubule depolymerization using Nocodazole (Noco). n in dendrites, animals: 22, 6 (Control), 7, 2 (Noco), 7, 2 (Cyto-D), 8, 2 (Lat-B). One-way ANOVA, Tukey test, p: 0.45 (Noco), 0.002 (Cyto-D),  $8.8 \times 10^{-5}$  (Lat-B). Representative Airyscan images (of **g**) of dendrites (**e**) and axons (**f**) expressing Lifeact-mCherry (cyan) and Mito-BFP (red). n in neurons, animals: 3, 1 (Control), 7, 2 (VAP KD). Scale bar, 5  $\mu\text{m}$  for **e** and 2  $\mu\text{m}$  for **f**. **g** Average spine actin displacement. n in spines, animals: 48, 1 (Control), 40, 1 (VAP KO). Two sample t-Test, p: 0.4. Average mitochondria-actin interaction on actin and microtubule depolymerization (**h**, n in axons, animals: 24, 6 (Control), 9, 2 (Noco), 8, 2 (Cyto-D), 7, 2 (Lat-B), One-way ANOVA, Tukey test, p: 0.6) and on knocking down the 8 proteins. (**i**, n: 17, 9 (Control), 6, 2 (Mcu), 8, 2 (Cap1), 10, 4 (Immt), 10, 2 (Snca), 8, 2 (Cyfip1), 7, 2 (Nckap1), 7, 2 (Pfn2), 11, 5 (Srgap2), 12, 2 (VAP). One-way ANOVA, Tukey test, p: 0.5). (**i**, inset) Representative Airyscan images of **i** showing mitochondrial (red) interaction with actin (white). Scale bar, 5  $\mu\text{m}$ . **j** Average correlation coefficient between mitochondria (Fis1-mCherry) and actin (Fis-Lifeact-GFP) in cell bodies in Control and VAP KD. n in regions, cell bodies, animals: 24, 4, 1 (Control), 16, 3, 1 (VAP KD). Two sample t-Test, p: 0.98. Source Data files are provided.

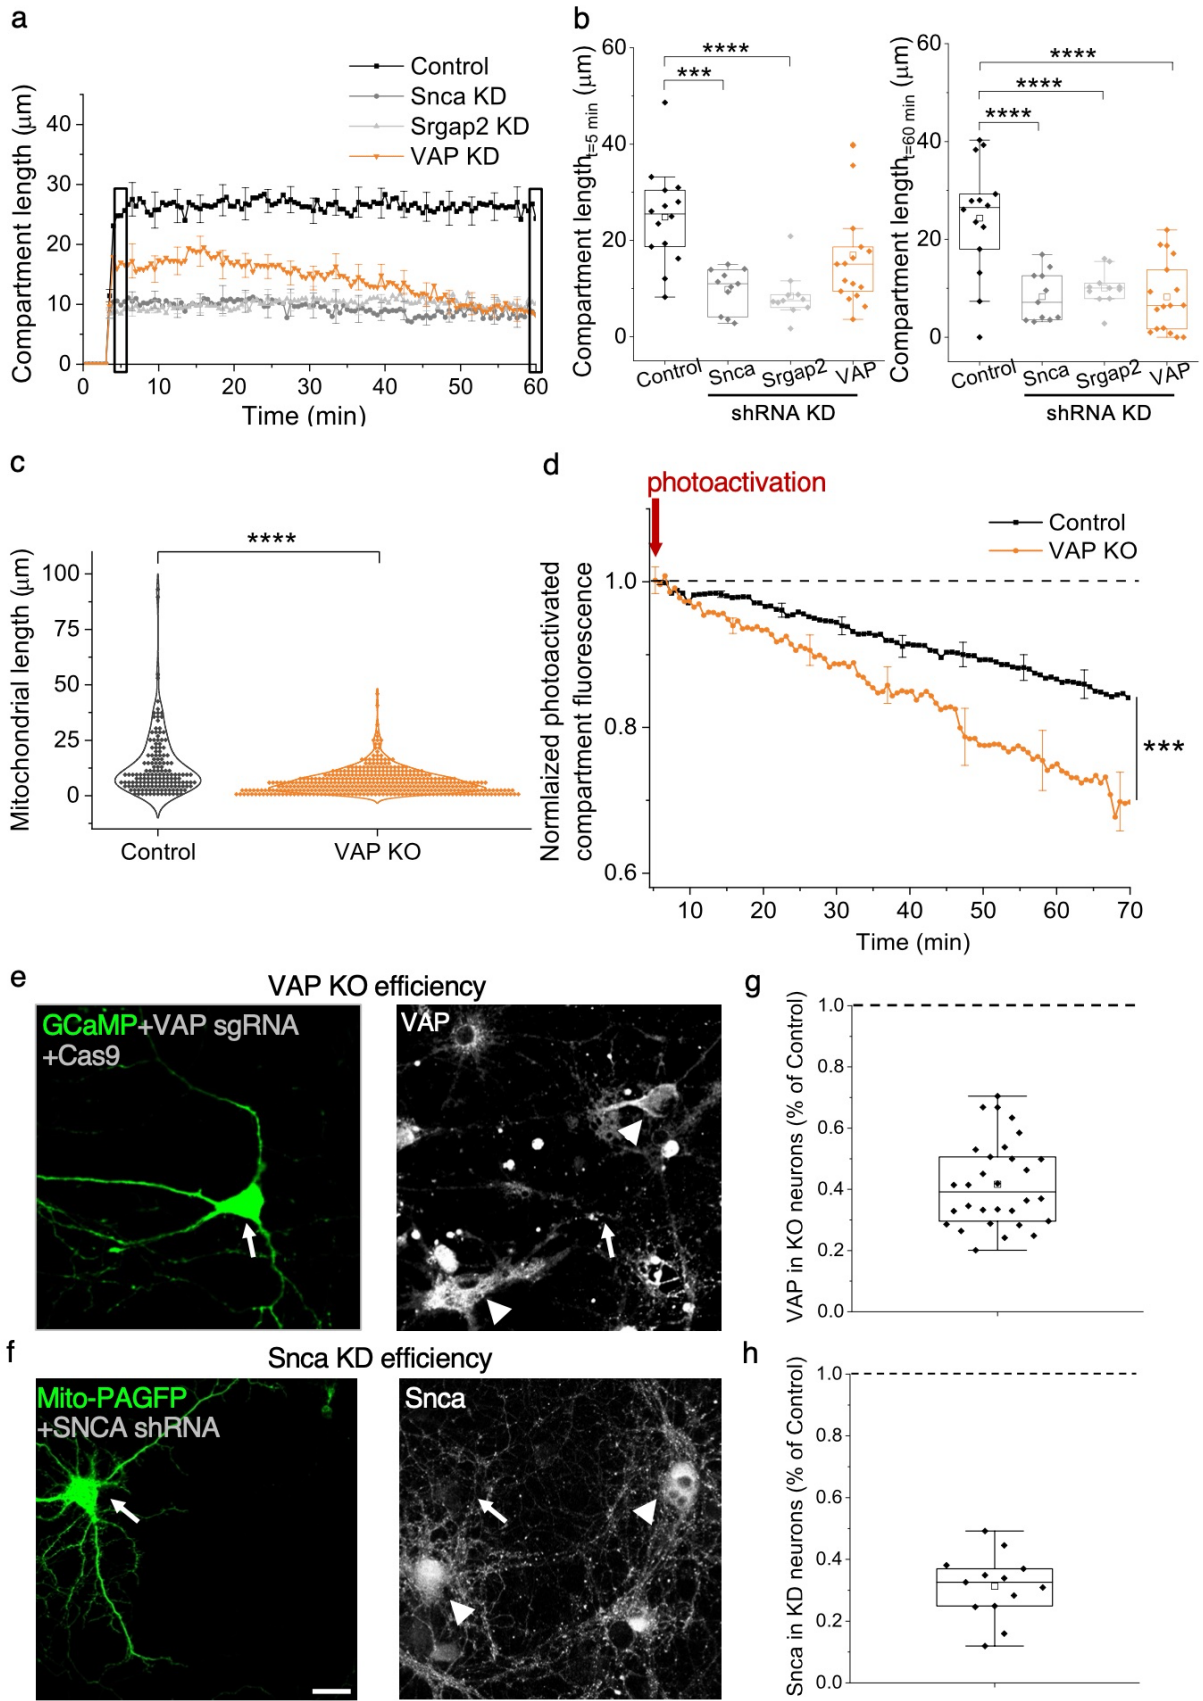

**Figure 4. Determination of mitochondrial compartment length and gene deletion efficiency.**

**a** Average time course of mitochondrial compartment lengths in Control (black), Snca KD (gray), Srgap2 KD (light gray), and VAP KD (orange). n in dendrites, animals: 14, 2 (Control), 11, 2, (Snca KD), 11, 2, (Srgap2 KD), 17, 4, (VAP KD). **b** Average compartment lengths from **a** (black rectangles) measured at 5 and 60 min post-photoactivation in Snca, Srgap2, and VAP KD at 60 minutes post-photoactivation. n: same as in **a**. Compartment length<sub>t=5 min</sub>:  $24.8 \pm 2.7 \mu\text{m}$  (Control),  $9.9 \pm 1.3 \mu\text{m}$  (Snca KD),  $8.4 \pm 1.4 \mu\text{m}$  (Srgap2 KD),  $17.0 \pm 2.7 \mu\text{m}$  (VAP KD); Compartment length<sub>t=60 min</sub>:  $24.3 \pm 3.1 \mu\text{m}$  (Control),  $8.3 \pm 1.5 \mu\text{m}$  (Snca KD),  $10.1 \pm 1.1 \mu\text{m}$  (Srgap2 KD),  $8.2 \pm 1.8 \mu\text{m}$  (VAP KD). One-way ANOVA, Tukey test, p for 5, 60 min:  $5.65 \times 10^{-4}$ ,  $3.79 \times 10^{-5}$  (Snca KD),  $1.53 \times 10^{-4}$ ,  $2.45 \times 10^{-4}$  (Srgap2 KD), 0.08,  $4.4 \times 10^{-6}$  (VAP KD). **c** Average mitochondrial length in Control and VAP KO. n in mitochondria, animals: 156, 2 (Control), 395, 2 (VAP KO). Two sample t-Test, p:  $1.69 \times 10^{-14}$ . **d** Average time course of photoactivated mitochondrial compartment shows a modest decrease in Control (black) and a statistically significant decrease in VAP KO (orange). The red arrow denotes the photoactivation time point. n in dendrites, animals: 14, 2 (Control), 11, 2 (VAP KO). Two sample t-Test, p:  $8.28 \times 10^{-4}$ . Representative images (of **g**, **h**) of transfected neurons (white arrow) expressing GCaMP or Mito-PAGFP (green) and VAP CRISPR-Cas9 sgRNAs (**e**) or Snca shRNA (**f**), and immunostained for VAP (**e**, white) or Snca (**f**, white) show reduced VAP and Snca immunofluorescence compared to untransfected, Control neurons (white arrowheads), identified using Map2. Similar results were obtained with VAP shRNA KD. Scale bar, 20  $\mu\text{m}$ . Reduced average VAP (**g**) and Snca (**h**) immunofluorescence in VAP KO and Snca KD neurons, respectively, compared to untransfected, Control neurons. n in neurons, animals: 30, 10 (VAP KO), 13, 2 (Snca KD). Due to lack of reliable antibodies for Srgap2, successful expression of Srgap2 shRNA was confirmed with Td-Tomato (Fig. 4a). Source Data files are provided.



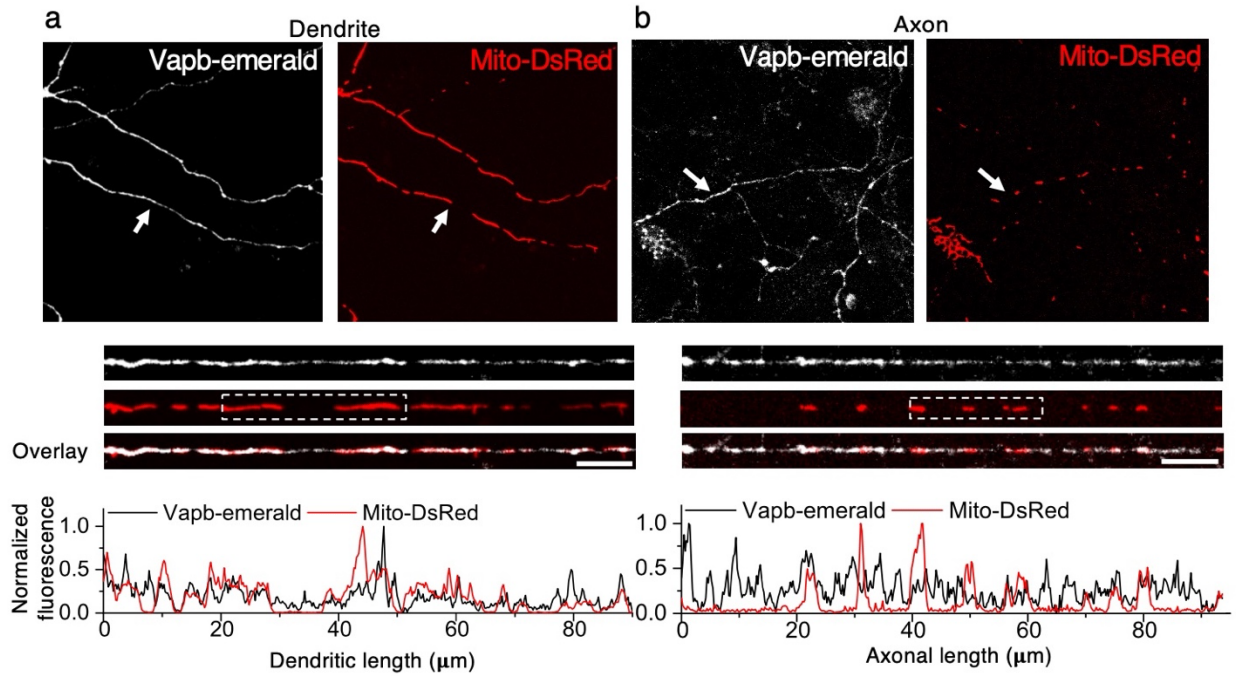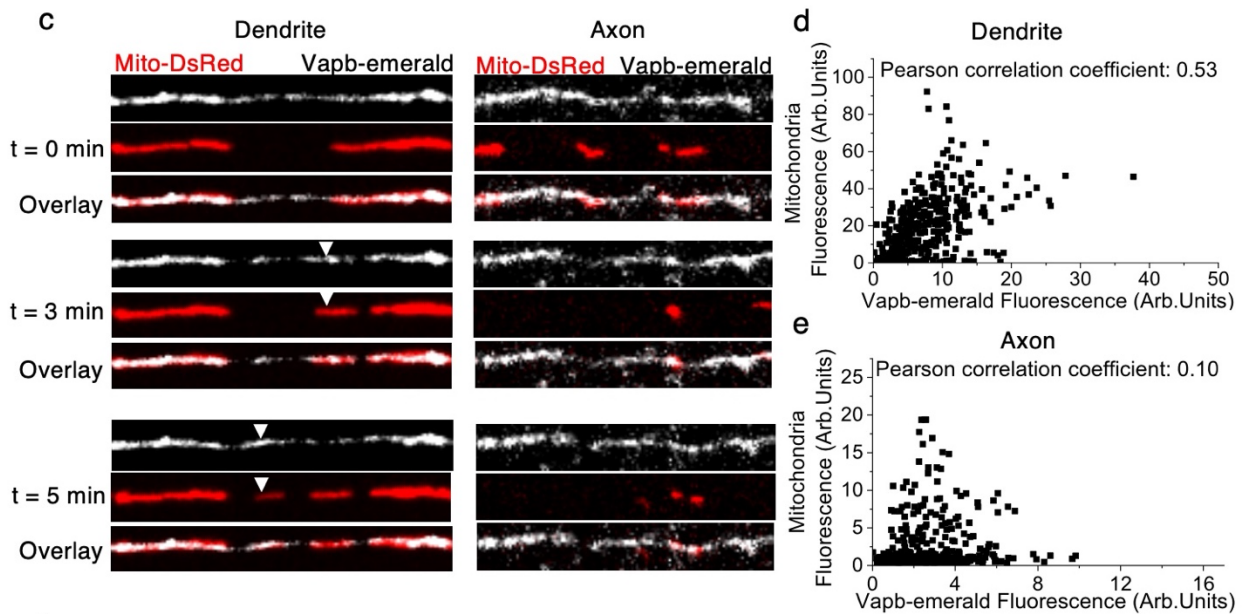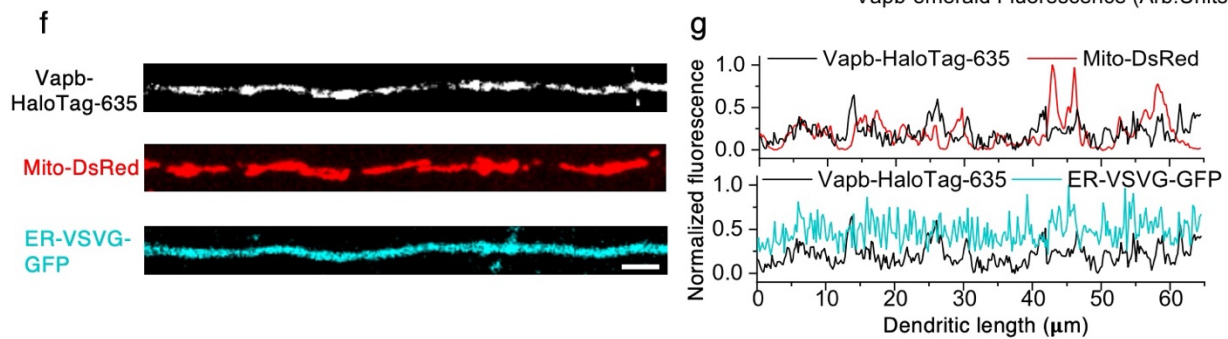

**Figure 5. Vapb is enriched near dendritic but not axonal mitochondria in live neurons. a**

Representative images (of Fig. 5i) of dendrites from live neurons expressing Vapb (Vapb-emerald, white) and mitochondria (Mito-DsRed, red). White arrows depict dendrites straightened and magnified below for better visualization and line profiles showing enrichment of Vapb near dendritic mitochondria in live neurons (inset). Scale bar, 5  $\mu\text{m}$ . **b** Representative images of axons from live neurons expressing Vapb (Vapb-emerald, white) and mitochondria (Mito-DsRed, red). White arrows depict axons straightened and magnified below for better visualization and line profiles showing negligible enrichment of Vapb near axonal mitochondria in live neurons (inset). As the Vapb signal is too low in axons, the brightness/contrast was adjusted for better visualization, making the background noise more visible in the axonal image compared to the dendrite image in **a**. Scale bar, 5  $\mu\text{m}$ . **c** Representative timelapse images of the dendritic and axonal segments from the insets in **a** and **b** (white dotted box) at  $t = 0, 3,$  and  $5$  min. In dendrites, when mitochondria undergo fission and move away from the parent mitochondria (Mito-Dsred, red, white arrowheads), they remain enriched with Vapb (Vapb-emerald, white, white arrowheads). However, Vapb enrichment was not seen in moving axonal mitochondria. Representative correlation (of 5i) between individual fluorescent pixel intensities of mitochondria (Mito-DsRed) and Vapb (Vapb-emerald) show a strong correlation in the dendrite (**d**) but not in the axon (**e**). Summarized data is available in Figure 5i. **f** Representative images of dendrites from live neurons expressing Vapb (Vapb-HaloTag-635, white), mitochondria (Mito-DsRed, red), and endoplasmic reticulum (ER-VSVG-GFP, cyan). Scale bar, 5  $\mu\text{m}$ . **g** Line profile showing that Vapb is enriched near dendritic mitochondria but is not distributed throughout the ER at confocal resolution. Total n: 3 neurons, 1 animal. Source Data files are provided.



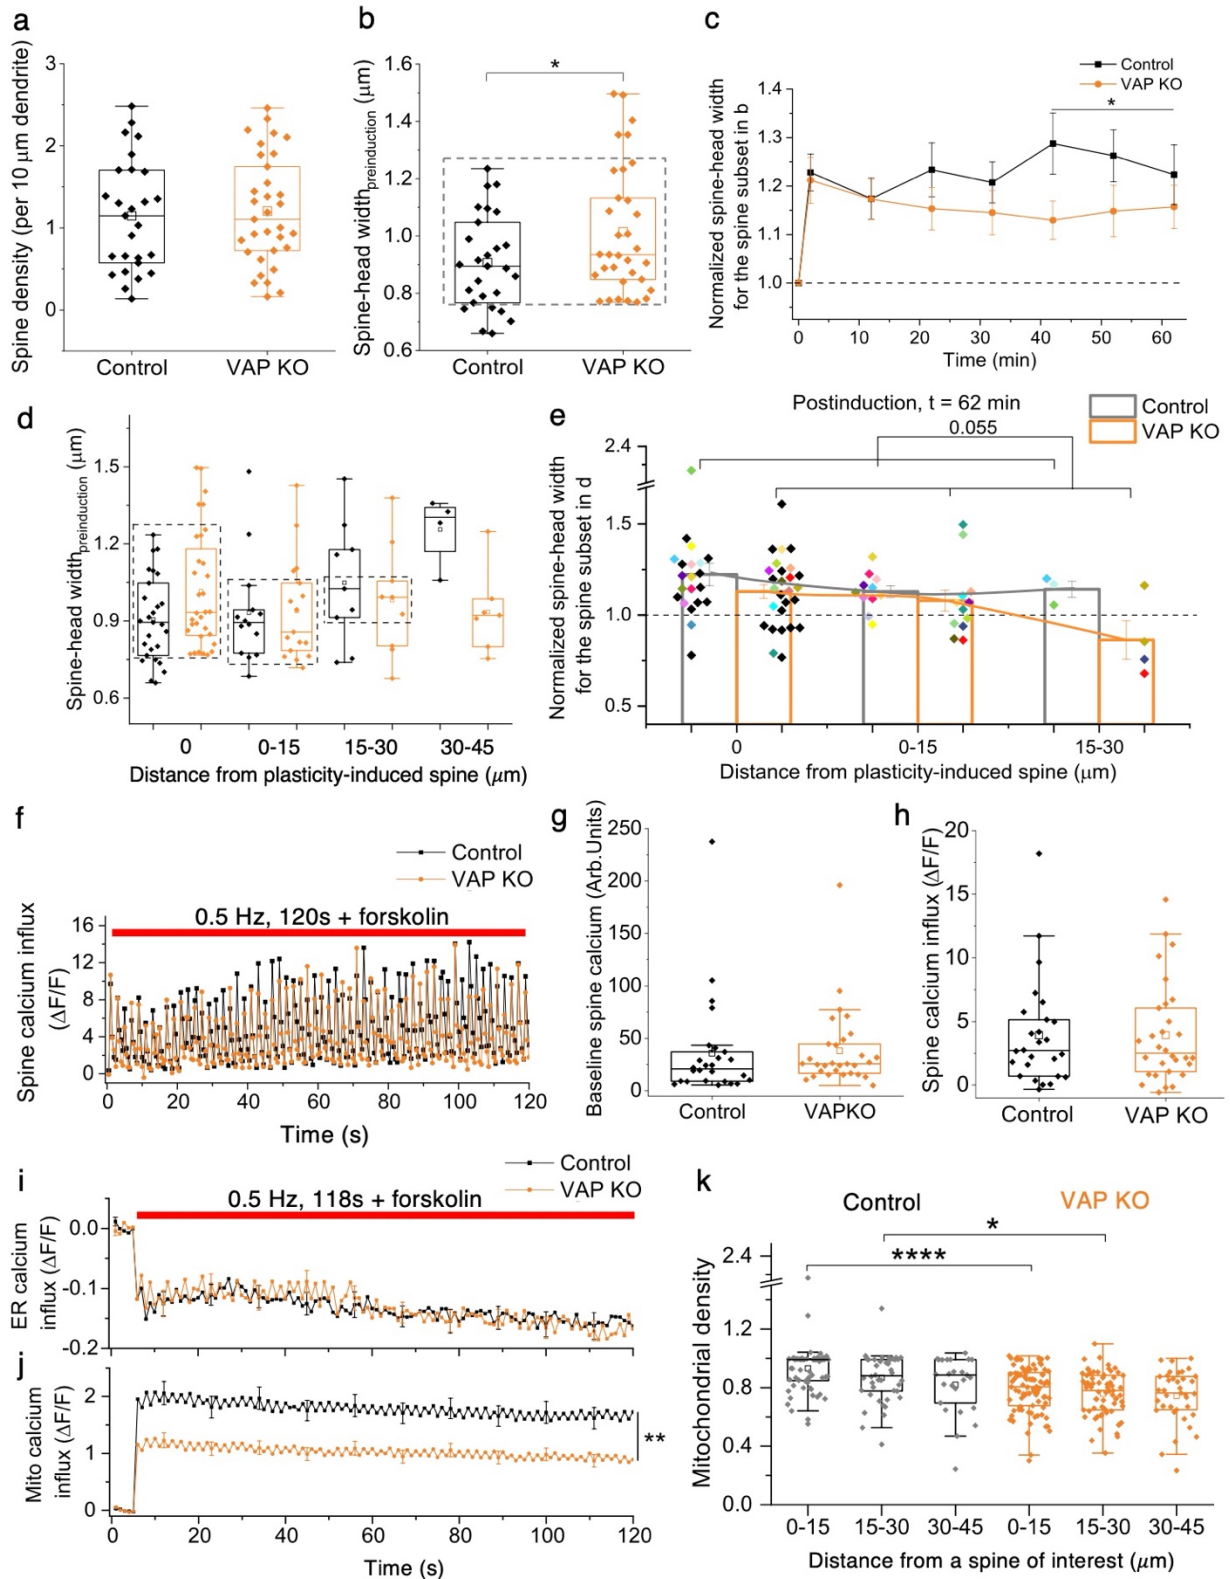

**Figure 6. VAP deletion does not affect spine density, and spine and ER calcium, but affects mitochondrial calcium.** **a** Spine density. *n* in dendrites, animals: 27, 11 (Control), 33, 7 (VAP

KO). Two sample t-Test,  $p: 0.74$ . **b** Spine-head width.  $\Delta\text{spine size}_{\text{increase}} = 0.1 \pm 0.07 \mu\text{m}$ ; Control,  $0.9 \pm 0.03$ ; VAP KO,  $1.0 \pm 0.04$ .  $n$  in spines, animals: 27, 11 (Control), 33, 7 (VAP KO). Two sample t-Test,  $p: 0.04$ . **c** Average time course of baseline-spine-head-width-matched spines from Control (black) and VAP KO (orange) in **b** (dotted box, spine size  $0.76 - 1.3 \mu\text{m}$ ).  $n$  in spines, animals: 21, 9 (Control), 28, 7 (VAP KO). One-way ANOVA, Tukey test,  $p: 0.025$  (42-62 min). **d** Baseline spine-head width of plasticity-induced and adjacent spines within 0-15, 15-30, and 30-45  $\mu\text{m}$ . For Control,  $n$  in spines, animals: 27, 11 (0  $\mu\text{m}$ ), 14, 8 (0-15  $\mu\text{m}$ ); 9, 5 (15-30  $\mu\text{m}$ ); 4, 2 (30-45  $\mu\text{m}$ ). For VAP KO,  $n$ : 32, 7 (0  $\mu\text{m}$ ); 17, 4 (0-15  $\mu\text{m}$ ); 9, 5 (15-30  $\mu\text{m}$ ); 7, 4 (30-45  $\mu\text{m}$ ). **e** Histogram of baseline-spine-head width-matched spines from Control (gray) and VAP KO (orange) in **d** (dotted boxes), 62 min post-plasticity induction. Individual points represent spines and are color-coded by neurons.  $n$  in spines, animals: 21, 9 (0  $\mu\text{m}$ ), 11, 6 (0-15  $\mu\text{m}$ ); 3, 3 (15-30  $\mu\text{m}$ ). For VAP KO,  $n$ : 27, 7 (0  $\mu\text{m}$ ); 12, 3 (0-15  $\mu\text{m}$ ); 4, 3 (15-30  $\mu\text{m}$ ). One-way ANOVA, Tukey test,  $p: 0.055$  (0, 0-15, 15-30). Representative trace (**f**) of the average baseline spine calcium (**g**) and spine calcium influx (**h**) during synaptic plasticity.  $n$  in spines, animals: 26, 11 (Control), 30, 6 (VAP KO). Two sample t-Test,  $p: 0.85$  (for **g**) and  $p: 1.0$  (for **h**). **i**, Average ER calcium release.  $n$  in dendrites, animals: 84, 3 (Control), 76, 3 (VAP KO). Mann Whitney Test,  $p: 0.5$ . **j** Average mitochondrial calcium influx.  $n$  in dendrites, animals: 54, 3 (Control), 76, 3 (VAP KO). Mann-Whitney Test,  $p: 0.002$ . **k** Mitochondrial density within different distance ranges from spines  $\sim 110 \mu\text{m}$  from the cell body.  $n$  in dendrites, animals: 38, 2 (Control), 50, 2 (VAP KO). One-way ANOVA, Tukey test,  $p: 1.08 \times 10^{-5}$  (0-15  $\mu\text{m}$ ),  $0.019$  (15-30  $\mu\text{m}$ ). Source Data files are provided.

## Supplementary Tables

**Table 1. 129 proteins found in the neuronal OMM proteome.**

Column 1: UniProt ID of the OMM proteome

Column 2: Gene names of the OMM proteome

Column 3: Protein names of the OMM proteome

Columns 4, 5, 6: Presence or absence of the OMM proteome in replicates R1, R2, and R3, respectively.

Column 7: GO annotation of the OMM proteome with the term “Mitochondria” revealed 26 proteins (20% of the OMM proteome), whereas the rest of the 103 proteins (80% of the OMM proteome) were not GO annotated as “Mitochondria” and were therefore OMM interacting proteins used for the screen.

Column 8: GO annotation of the OMM proteome with the term “Endoplasmic Reticulum” revealed 18 proteins (14% of the OMM proteome), of which 3 proteins – Dnm1l, Prkca, and Uba1 – are also GO annotated as “Mitochondria”.

Column 9: Comparison of the neuronal OMM proteome with the published OMM+NES proteome and OMM exclusive proteome in HEK cells<sup>2</sup> revealed 69 overlapping proteins (53% of the neuronal OMM proteome).

Column 10: Actin (Actb) interactors in the OMM proteome revealed 18 proteins.

Column 11: Tubulin (Tuba1a) interactors in the OMM proteome revealed 6 proteins.

Column 12: Comparison of the OMM proteome with the most abundant soluble proteins in the neuropil proteome revealed only 22 (17%) overlapping proteins, confirming that the OMM proteome is not proteins merely bumping mitochondria by chance with no functional interaction.

Column 13: Comparison of the OMM proteome with all the soluble proteins in the neuropil proteome revealed only 31 (24%) overlapping proteins, confirming that APEX-OMM labeling is not too promiscuous in that it only results in soluble proteins.

| UniProt ID | Gene Name | Protein Name         | R 1 | R 2 | R 3 | GO Annotation "Mitochondria" | GO Annotation "Endoplasmic Reticulum" | OMM+NES proteome and OMM excl. proteome (Hung et al., eLife 2017) | Actin Interactors using BioGRID | Tubulin Interactors using BioGRID | Most abundant soluble proteins in the neuropil proteome | All soluble proteins in the neuropil proteome |
|------------|-----------|----------------------|-----|-----|-----|------------------------------|---------------------------------------|-------------------------------------------------------------------|---------------------------------|-----------------------------------|---------------------------------------------------------|-----------------------------------------------|
| A2VD09     | abi1      | Abl interactor 1     | +   |     | +   |                              |                                       | +                                                                 |                                 |                                   | +                                                       | +                                             |
| G3V9G4     | acly      | ATP-citrate synthase | +   |     | +   |                              |                                       | +                                                                 |                                 |                                   |                                                         | +                                             |



|             |           |                                                                                 |   |   |   |   |   |   |   |   |   |   |
|-------------|-----------|---------------------------------------------------------------------------------|---|---|---|---|---|---|---|---|---|---|
|             |           | transportin g ATPase 2                                                          |   |   |   |   |   |   |   |   |   |   |
| Q216B2      | atp6v0 a1 | V-type proton ATPase subunit a;V-type proton ATPase 116 kDa subunit a isoform 1 | + | + | + |   |   | + |   |   |   |   |
| D4A133      | atp6v1 a  | H(+)-transportin g two-sector ATPase                                            | + | + | + |   |   | + | + |   |   |   |
| P62815      | atp6v1 b2 | V-type proton ATPase subunit B, brain isoform                                   | + |   | + |   |   | + |   |   |   |   |
| Q62717      | cadps     | Calcium-dependent secretion activator 1                                         | + |   | + |   |   |   |   |   |   |   |
| P11730      | camk2 g   | Calcium/calmodulin-dependent protein kinase type II subunit gamma               |   | + | + |   | + | + |   |   |   |   |
| A0A0G2 K1R5 | camkv     | CaM kinase-like vesicle-associated protein                                      | + | + | + |   |   |   |   |   |   |   |
| P97536      | cand1     | Cullin-associated NEDD8-dissociated protein 1                                   | + |   | + |   |   | + |   |   | + | + |
| Q08163      | cap1      | Adenylyl cyclase-associated protein 1                                           | + |   | + | + |   | + | + |   |   |   |
| Q68FQ0      | cct5      | T-complex protein 1 subunit epsilon                                             | + |   | + |   |   |   |   |   | + | + |
| Q3MHS 9     | cct6a     | Chaperonin containing Tcp1, subunit 6A (Zeta 1)                                 | + |   | + |   |   |   |   |   | + | + |
| A0A0G2 JSM8 | cdc42     | Cell division                                                                   | + | + | + |   |   | + | + | + |   |   |



|            |         |                                                         |   |   |   |   |  |   |  |   |   |   |
|------------|---------|---------------------------------------------------------|---|---|---|---|--|---|--|---|---|---|
|            |         | control protein 42 homolog                              |   |   |   |   |  |   |  |   |   |   |
| Q5BJT9     | ckmt1b  | Creatine kinase U-type, mitochondrial                   | + |   | + |   |  |   |  |   |   |   |
| Q99JD4     | clasp2  | CLIP-associating protein 2                              | + | + | + |   |  | + |  |   |   |   |
| G3V624     | coro1c  | Coronin                                                 | + |   | + |   |  | + |  |   | + | + |
| D3ZGN2     | cpne5   | Copine-9                                                | + |   | + |   |  |   |  |   |   |   |
| D3ZPR0     | cse1l   | Chromosome segregation 1-like protein                   | + | + |   |   |  | + |  |   |   |   |
| A0A0G2JT93 | ctnnb1  | Catenin beta-1                                          | + |   | + |   |  | + |  |   |   |   |
| A0A0G2K472 | cyfip1  | Cytoplasmic FMR1-interacting protein                    | + | + | + |   |  | + |  | + |   |   |
| D3ZX82     | cyfip2  | Cytoplasmic FMR1 interacting protein 2 (Predicted)      | + |   | + |   |  | + |  |   | + | + |
| A0A0G2K719 | ddx3y   | RNA helicase                                            | + |   | + |   |  |   |  |   |   |   |
| F1M3W5     | dmxl2   | Dmx-like 2                                              | + |   | + |   |  | + |  |   |   |   |
| Q5M9H7     | dnaja2  | DnaJ (Hsp40) homolog, subfamily A, member 2             | + |   | + |   |  | + |  |   |   |   |
| D4A0I5     | dnajc6  | DnaJ (Hsp40) homolog, subfamily C, member 6 (Predicted) | + |   | + |   |  |   |  |   |   |   |
| O35303     | dnm1l   | Dynamin-1-like protein                                  | + |   | + | + |  | + |  |   |   |   |
| F1LNT0     | dpysl4  | Dihydropyrimidinase-related protein 4                   | + |   | + |   |  | + |  |   |   |   |
| M0R9X8     | dync1h1 | Cytoplasmic dynein 1 heavy chain 1                      | + | + |   |   |  | + |  |   |   |   |











|            |        |                                                                                                                                                                                                                                           |   |   |   |   |  |   |  |  |  |   |   |
|------------|--------|-------------------------------------------------------------------------------------------------------------------------------------------------------------------------------------------------------------------------------------------|---|---|---|---|--|---|--|--|--|---|---|
| Q80Z30     | ppm1e  | Protein phosphatase 1E                                                                                                                                                                                                                    | + | + | + | + |  |   |  |  |  | + | + |
| A0A0G2JYS8 | ppp1cc | Serine/threonine-protein phosphatase; Serine/threonine-protein phosphatase PP1-gamma catalytic subunit; Serine/threonine-protein phosphatase PP1-beta catalytic subunit; Serine/threonine-protein phosphatase PP1-alpha catalytic subunit | + |   | + | + |  |   |  |  |  |   |   |
| A0A0G2JYA4 | ppp2ca | Serine/threonine-protein phosphatase 2A catalytic subunit alpha isoform; Serine/threonine-protein phosphatase 2A catalytic subunit beta isoform                                                                                           | + |   | + |   |  | + |  |  |  |   |   |
| Q5XI34     | ppp2ra | Protein phosphatase 2 (Formerly 2A), regulatory subunit A (PR 65), alpha isoform, isoform CRA_a                                                                                                                                           | + |   | + |   |  | + |  |  |  | + | + |
| P36876     | ppp2ra | Serine/threonine-protein                                                                                                                                                                                                                  | + |   | + |   |  | + |  |  |  | + | + |

|            |            |                                                                                                                                             |   |   |   |   |  |   |   |  |   |   |
|------------|------------|---------------------------------------------------------------------------------------------------------------------------------------------|---|---|---|---|--|---|---|--|---|---|
|            |            | phosphatase 2A 55 kDa regulatory subunit B alpha isoform; Serine/threonine-protein phosphatase 2A 55 kDa regulatory subunit B delta isoform |   |   |   |   |  |   |   |  |   |   |
| P63329     | ppp3ca     | Serine/threonine-protein phosphatase 2B catalytic subunit alpha isoform                                                                     | + |   | + |   |  |   | + |  |   |   |
| A0A0G2K7T5 | ppp3cb     | Serine/threonine-protein phosphatase 2B catalytic subunit beta isoform                                                                      | + |   | + |   |  |   |   |  |   |   |
| A0A0H2UHV6 | ppp3r1     | Calcineurin subunit B type 1                                                                                                                | + |   | + |   |  |   |   |  |   |   |
| F1M2P8     | prkca      | Protein kinase C; Protein kinase C alpha type                                                                                               | + |   | + | + |  | + |   |  |   |   |
| Q6NYB7     | rab1a      | Ras-related protein Rab-1A                                                                                                                  | + |   | + |   |  | + |   |  | + |   |
| A1L1J8     | rab5b      | RAB5B, member RAS oncogene family                                                                                                           | + |   | + |   |  |   |   |  |   |   |
| A0A0G2K0X4 | rac1       | Ras-related C3 botulinum toxin substrate 1                                                                                                  | + |   | + |   |  |   | + |  | + | + |
| D3ZAS1     | rgd1562399 | 40S ribosomal protein S2                                                                                                                    | + | + | + |   |  |   |   |  |   |   |

|             |          |                                                             |   |   |   |   |  |   |   |  |   |   |   |
|-------------|----------|-------------------------------------------------------------|---|---|---|---|--|---|---|--|---|---|---|
| A1L1L6      | rhot1    | Mitochondrial Rho GTPase                                    | + |   | + | + |  |   | + |  |   |   |   |
| A0A0G2 KBA1 | rpl6     | 60S ribosomal protein L6                                    | + |   | + |   |  | + |   |  | + |   |   |
| Q6RJR6      | rtn3     | Reticulon-3                                                 | + |   | + |   |  | + |   |  |   |   |   |
| F1LQN3      | rtn4     | Reticulon;Reticulon-4                                       | + | + | + |   |  | + |   |  |   |   |   |
| A0A0G2 K6A9 | rufy3    | Protein RUFY3                                               | + |   | + |   |  |   | + |  |   |   |   |
| D3ZT07      | sep5     | Septin-5                                                    | + |   | + |   |  |   |   |  |   |   |   |
| Q62634      | slc17a7  | Vesicular glutamate transporter 1                           | + | + |   |   |  |   |   |  |   |   |   |
| A0A159 KIL2 | slc1a2   | Amino acid transporter; Excitatory amino acid transporter 2 | + |   | + |   |  |   |   |  |   |   |   |
| A0A0G2 K611 | slc1a3   | Amino acid transporter; Excitatory amino acid transporter 1 | + |   | + | + |  |   |   |  |   |   |   |
| F1LZW6      | slc25a13 | Solute carrier family 25 member 13                          | + |   | + | + |  |   |   |  |   |   |   |
| P23978      | slc6a1   | Sodium- and chloride-dependent GABA transporter 1           | + |   | + |   |  |   |   |  |   |   |   |
| Q05140      | snap91   | Clathrin coat assembly protein AP180                        |   |   | + | + |  |   |   |  |   |   |   |
| P37377      | snca     | Alpha-synuclein                                             | + |   | + | + |  |   | + |  | + | + |   |
| A0A0G2 JSQ1 | sncb     | Beta-synuclein                                              | + | + | + |   |  |   |   |  | + |   |   |
| B2RZB7      | snrpd1   | Small nuclear ribonucleoprotein Sm D1                       | + |   | + |   |  |   |   |  |   |   | + |
| D4A208      | srgap2   | SLIT-ROBO Rho GTPase-                                       | + |   | + |   |  |   | + |  | + |   |   |

|        |         |                                                          |   |   |   |   |   |   |   |  |   |   |
|--------|---------|----------------------------------------------------------|---|---|---|---|---|---|---|--|---|---|
|        |         | activating protein 2                                     |   |   |   |   |   |   |   |  |   |   |
| P61265 | stx1b   | Syntaxin-1B                                              | + |   | + |   |   |   |   |  |   |   |
| Q02563 | sv2a    | Synaptic vesicle glycoprotein 2A                         | + | + | + |   | + |   |   |  |   |   |
| D4ABK1 | syng3   | Synaptogyrin 3                                           | + | + | + |   |   | + |   |  |   |   |
| P07825 | syp     | Synaptophysin                                            | + | + | + |   |   | + |   |  |   |   |
| I6L9G6 | tardbp  | TAR DNA-binding protein 43                               | + |   | + |   |   |   |   |  |   | + |
| R9PXR4 | tomm70a | Mitochondrial import receptor subunit TOM70              | + |   | + | + |   | + |   |  |   |   |
| G3V8D6 | trim3   | Tripartite motif-containing protein 3                    | + |   | + |   |   | + |   |  |   | + |
| P11232 | txn     | Thioredoxin                                              | + |   | + |   |   |   |   |  |   |   |
| Q5U300 | uba1    | Ubiquitin-like modifier-activating enzyme 1              | + | + | + | + | + | + |   |  | + | + |
| D3ZC84 | usp9x   | Ubiquitin carboxyl-terminal hydrolase                    | + |   | + |   |   | + |   |  |   |   |
| Q9Z270 | vapa    | Vesicle-associated membrane protein-associated protein A | + |   | + |   | + | + | + |  |   |   |
| P46462 | vcp     | Transitional endoplasmic reticulum ATPase                | + | + | + |   | + | + |   |  | + | + |
| B5DFC1 | vps35   | Vps35 protein                                            | + |   | + | + |   | + |   |  |   |   |
| Q56A29 | vsnl1   | Visinin-like protein 1                                   | + |   | + |   |   |   |   |  |   |   |
| Q5BJU7 | wasf1   | Wiskott-Aldrich syndrome protein family member 1         | + |   | + | + |   | + |   |  | + | + |
| D3ZQ02 | wdr37   | WD repeat domain 37                                      | + |   | + |   |   | + |   |  |   |   |
| G3V9M3 | wdr47   | RCG28460                                                 | + | + | + |   |   | + |   |  |   | + |

|        |       |                                                                              |   |   |   |  |  |  |   |  |   |  |  |   |  |   |
|--------|-------|------------------------------------------------------------------------------|---|---|---|--|--|--|---|--|---|--|--|---|--|---|
| P35213 | ywhab | 14-3-3 protein beta/alpha; 14-3-3 protein beta/alpha, N-terminally processed | + |   | + |  |  |  | + |  | + |  |  | + |  | + |
| P68255 | ywhaq | 14-3-3 protein theta                                                         | + | + | + |  |  |  | + |  | + |  |  | + |  | + |



**Table 2. 18 actin interactors found in the OMM proteome**

Column 1: UniProt ID of the actin (Actb) interactors in the OMM proteome

Column 2: Gene names of the actin interactors in the OMM proteome

Column 3: Protein names of the actin interactors in the OMM proteome and the 8 candidates investigated in this study (gray rows)

Columns 4, 5, 6: Presence or absence of the actin interactors in the OMM proteome in replicates R1, R2, and R3, respectively.

Column 7: GO annotation of the actin interactors in the OMM proteome with the term "Mitochondria" revealed 5 proteins, whereas the rest of the 13 proteins are not GO annotated as "Mitochondria".

Column 8: 18 Actin interactors found in the OMM.

Column 9: 5 Tubulin (Tuba1a) interactors that are also OMM-actin interactors.

| UniProt ID | Gene Name | Protein Name                                                        | R 1 | R 2 | R 3 | GO Annotation "Mitochondria" | Actin Interactor | Tubulin Interactor |
|------------|-----------|---------------------------------------------------------------------|-----|-----|-----|------------------------------|------------------|--------------------|
| A0A0G2JVH4 | immt      | MICOS complex subunit Mic60                                         | +   | +   |     | +                            | +                |                    |
| P37377     | snca      | Alpha-synuclein                                                     | +   |     | +   | +                            | +                | +                  |
| D4A208     | srgap2    | SLIT-ROBO Rho GTPase-activating protein 2                           | +   |     | +   |                              | +                |                    |
| Q9Z270     | vapa      | Vesicle-associated membrane protein-associated protein A            | +   |     | +   |                              | +                |                    |
| Q08163     | cap1      | Adenylyl cyclase-associated protein 1                               | +   |     | +   | +                            | +                |                    |
| A0A0G2K472 | cyfip1    | Cytoplasmic FMR1-interacting protein                                | +   | +   | +   |                              | +                |                    |
| F1LSM5     | nckap1    | Nck-associated protein 1                                            | +   |     | +   |                              | +                |                    |
| D3ZDU5     | pfn2      | Profilin;Profilin-2                                                 | +   | +   | +   |                              | +                |                    |
| D4A133     | atp6v1a   | H(+)-transporting two-sector ATPase                                 | +   | +   | +   |                              | +                |                    |
| A0A0G2KBA1 | rpl6      | 60S ribosomal protein L6                                            | +   |     | +   |                              | +                |                    |
| Q3ZB97     | ap2b1     | AP complex subunit beta;AP-2 complex subunit beta                   | +   | +   | +   |                              | +                |                    |
| A0A0G2JSM8 | cdc42     | Cell division control protein 42 homolog                            | +   | +   | +   |                              | +                | +                  |
| P63170     | dynll1    | Dynein light chain 1, cytoplasmic;Dynein light chain 2, cytoplasmic | +   |     | +   | +                            | +                | +                  |
| Q5D059     | hnrnpk    | Heterogeneous nuclear ribonucleoprotein K                           | +   | +   | +   | +                            | +                | +                  |

|            |       |                                                                             |   |   |   |  |   |   |
|------------|-------|-----------------------------------------------------------------------------|---|---|---|--|---|---|
| Q6NYB7     | rab1a | Ras-related protein Rab-1A                                                  | + |   | + |  | + |   |
| A0A0G2K0X4 | rac1  | Ras-related C3 botulinum toxin substrate 1                                  | + |   | + |  | + | + |
| P35213     | ywhab | 14-3-3 protein beta/alpha;14-3-3 protein beta/alpha, N-terminally processed | + |   | + |  | + |   |
| P68255     | ywhaq | 14-3-3 protein theta                                                        | + | + | + |  | + |   |

## References

- 1 Chapman-Smith, A. & Cronan, J. E., Jr. Molecular biology of biotin attachment to proteins. *J Nutr* **129**, 477S-484S, doi:10.1093/jn/129.2.477S (1999).
- 2 Hung, V. *et al.* Proteomic mapping of cytosol-facing outer mitochondrial and ER membranes in living human cells by proximity biotinylation. *Elife* **6**, doi:10.7554/eLife.24463 (2017).
